## **Title: Individual differences in frontoparietal plasticity in humans**

Austin L. Boroshok,<sup>1\*</sup> Anne T. Park,<sup>1</sup> Panagiotis Fotiadis,<sup>2</sup> Gerardo H. Velasquez,<sup>1</sup> Ursula A. Tooley,<sup>1,2</sup> Katrina R. Simon,<sup>3</sup> Jasmine C.P. Forde,<sup>1</sup> Lourdes M. Delgado Reyes,<sup>1</sup> M. Dylan Tisdall,<sup>4</sup> Dani S. Bassett,<sup>5,6,7,8,9,10</sup> Emily A. Cooper,<sup>11</sup> and Allyson P. Mackey<sup>1</sup>

### **Affiliations:**

<sup>1</sup> Department of Psychology, School of Arts and Sciences, University of Pennsylvania, Philadelphia, PA, 19104

<sup>2</sup> Neuroscience Graduate Group, University of Pennsylvania, Philadelphia, PA, 19104

<sup>3</sup> Teachers College, Columbia University, New York, NY, 10027

<sup>4</sup> Department of Radiology, Perelman School of Medicine, University of Pennsylvania, Philadelphia, PA, 19104

<sup>5</sup> Department of Bioengineering, School of Engineering and Applied Sciences, University of Pennsylvania, Pennsylvania, PA 19104, USA

<sup>6</sup> Department of Electrical & Systems Engineering, School of Engineering and Applied Sciences, University of Pennsylvania, Pennsylvania, PA 19104, USA

<sup>7</sup> Department of Physics & Astronomy, School of Arts and Sciences, University of Pennsylvania, Pennsylvania, PA 19104, USA

<sup>8</sup> Department of Neurology, Perelman School of Medicine, University of Pennsylvania, Pennsylvania, PA 19104, USA

<sup>9</sup> Department of Psychiatry, Perelman School of Medicine, University of Pennsylvania, Pennsylvania, PA 19104, USA

<sup>10</sup> Santa Fe Institute, Santa Fe, NM 87501 USA

<sup>11</sup> School of Optometry & Helen Wills Neuroscience Institute, University of California, Berkeley, Berkeley, CA, 94720

### **Author Information**

Austin L. Boroshok\* (corresponding author)

425 S. University Ave, Stephen A. Levin Bldg., University of Pennsylvania, Philadelphia, PA, 19104

(443) 752-4350

boroshok@sas.upenn.edu

Anne T. Park

425 S. University Ave, Stephen A. Levin Bldg., University of Pennsylvania, Philadelphia, PA, 19104

(443) 878-2083

annepark@sas.upenn.edu

Panagiotis Fotiadis

240 S. 33rd St., Hayden Hall, University of Pennsylvania, Philadelphia, PA, 19104

(734) 276-9151

panagiotis.fotiadis@penmedicine.upenn.edu

Gerardo H. Velasquez  
311 Christopher Dr, San Francisco, CA 94131  
(760) 668-3512  
gerardo.velasquez@ucsf.edu

Ursula A. Tooley  
425 S. University Ave, Stephen A. Levin Bldg., University of Pennsylvania, Philadelphia, PA,  
19104  
(202) 413-5627  
utooley@penncmedicine.upenn.edu

Katrina R. Simon  
520 W 120th St., Box 199, Russell Hall 21, Teachers College, Columbia University, New York,  
NY 10027  
(212) 678-3319  
krs2174@tc.columbia.edu

Jasmine C.P. Forde  
11 Mystery Rose Ln, West Grove, PA, 19390  
(610) 299-7731  
jcpforde@gmail.com

Lourdes M Delgado Reyes  
425 S. University Ave, Stephen A. Levin Bldg., University of Pennsylvania, Philadelphia, PA,  
19104  
(302) 546-1810  
ldelgrey@sas.upenn.edu

M. Dylan Tisdall  
3700 Hamilton Walk, Rm. D406, Richards Medical Research Laboratory Bldg. University of  
Pennsylvania, Philadelphia, PA, 19104  
(215) 573-4003  
mtisdall@penncmedicine.upenn.edu

Danielle S. Bassett  
240 S. 33rd St., Hayden Hall, University of Pennsylvania, Philadelphia, PA, 19104  
(215) 746-1754  
dsb@seas.upenn.edu

Emily A. Cooper  
391 Minor Hall, University of California, Berkeley, Berkeley, CA, 94720  
(510) 664-4060  
emilycooper@berkeley.edu

Allyson P. Mackey

425 S. University Ave, Stephen A. Levin Building, University of Pennsylvania, Philadelphia, PA,  
19104

(215) 573-3071

mackeya@sas.upenn.edu

**Author Contributions Statement:**

A.L. Boroshok, A.P. Mackey, E.A. Cooper, M. Dylan Tisdall, K.R. Simon, and J.C.P. Forde developed the study concept. All authors contributed to the study design. Testing and data collection were performed by A.L. Boroshok, A.T. Park, G.H. Velasquez, U.A. Tooley, K.R. Simon, and J.C.P. Forde. A.L. Boroshok performed the data analysis and interpretation under the supervision of A.P. Mackey. P. Fotiadis, M. Dylan Tisdall, and E.A. Cooper made substantial contributions to methodological and analytic tools. A.L. Boroshok and A.P. Mackey drafted the manuscript, and A.T. Park, G.H. Velasquez, P. Fotiadis, U.A. Tooley, K.R. Simon, J.C.P. Forde, L.M. Delgado Reyes, M. Dylan Tisdall, D.S. Bassett, and E.A. Cooper provided critical revisions. All authors approved the final version of the manuscript for submission.

**Competing Interests Statement:** The authors declare that there are no competing interests.

**Acknowledgments:** We first thank all of the individuals who participated in this research. We also thank Adam Pines, Quentin Wedderburn, Yoojin Hahn, Stephanie Bugden, Ph.D., Ava Cruz, Samantha Ferleger, Destiny Frazier, Jessica George, Abigail Katz, Connor Kendzora, Anna Meaney, Leah Sorcher, Aparna Ramanujam, Daniel Southwick, Alexis Broussard, and Andrea Gomez for their help with data acquisition and cleaning. Finally, we would like to thank Marco Ganzetti for his valuable input towards the usage of the *MRTool* toolbox.

**Funding statement:** This study was supported by a Behavioral and Cognitive Neuroscience Training Grant (NIH T32-MH017168 to A.T.P.), and National Science Foundation Graduate Research Fellowships (to A.L.B. and U.A.T. under Grant No. DGE-1845298), as well as start-up funds from the University of Pennsylvania.

**Keywords:** neuroplasticity, working memory, learning, myelin mapping, resting-state MRI, ventral tegmental area, prefrontal cortex

## Abstract

Neuroplasticity, defined as the brain's ability to change in response to its environment, has been extensively studied at the cellular and molecular levels. Work in animal models suggests that stimulation to the ventral tegmental area (VTA) enhances plasticity, and that myelination constrains plasticity. Little is known, however, about whether proxy measures of these properties in the human brain are associated with learning. Here we investigated the plasticity of the frontoparietal system (FPS), which supports complex cognition. We asked whether VTA resting-state functional connectivity and myelin map (T1-w/T2-w ratio) values predicted learning

after short-term training on a FPS-dependent task: the adaptive *n*-back ( $n = 46$ , ages 18-25). We found that stronger connectivity between VTA and lateral prefrontal cortex at baseline predicted greater improvements in accuracy. Lower myelin map values predicted improvement in response times, but not accuracy. Our findings suggest that proxy markers of neural plasticity can predict learning in humans.

## Introduction

Neuroplasticity can be defined as the brain's ability to change in response to new experiences. Animal studies at the level of cells and synapses have made substantial progress in identifying factors that facilitate and constrain neuroplasticity<sup>1</sup>. In a landmark study, stimulation of the ventral tegmental area (VTA), a key source of dopamine for the cortex, restored juvenile-like plasticity in the auditory cortex of adult animals<sup>2</sup>. Conversely, myelination has been shown to limit major synaptic remodeling<sup>3</sup> and over 50% of myelin in the cortex is associated with parvalbumin-positive (PV+) inhibitory interneurons<sup>4,5</sup>, which are cells that limit plasticity<sup>6</sup>. However, even once myelin is in place, modulatory neurotransmitters can increase plasticity<sup>7</sup>. Together, these studies suggest that individual differences in dopamine system connectivity and myelination may, at least partially, explain important variance in plasticity in humans.

The frontoparietal system (FPS) may be a particularly useful target of research on individual differences in neuroplasticity in humans as it is characterized by a dense expression of dopamine receptors and is lightly myelinated<sup>8-10</sup>. The FPS is also thought to be highly plastic due to its protracted development<sup>11,12</sup> and high interindividual variability<sup>13</sup>. High FPS plasticity may be essential for its role as the "multiple demand network"<sup>14</sup> and its ability to flexibly adapt its function to meet novel task demands. Further, because the FPS supports complex cognitive functions including working memory and reasoning<sup>15,16</sup>, investigating variability in neuroplasticity within this system may be important for understanding why some individuals benefit more from educational or cognitive interventions. However, as the FPS has expanded dramatically over the course of evolution<sup>17,18</sup>, it is more difficult to compare to animal models than sensory or motor cortices.

Some work has been done to understand how much the FPS can change its function and integration with other brain systems with practice. Long-term reasoning and working memory practice leads to decreases in functional activation in the FPS<sup>19-26</sup>, and increased functional and structural connectivity between regions of the FPS<sup>27-31</sup>. However, less has been done to identify predictors of FPS plasticity. One study showed that individuals with greater gray matter volume in the dorsolateral prefrontal cortex and other regions predicted greater learning over five to six weeks of practice with a cognitively complex video game<sup>32</sup>. Across a broader set of learning tasks, including perceptual and motor learning, greater learning over days or weeks has been predicted by greater task activation during a to-be-learned task<sup>33-35</sup> and during feedback on a separate task<sup>36</sup>, greater cortical thickness in task-relevant regions<sup>37</sup>, and stronger functional connectivity within task-relevant regions<sup>38,39</sup>.

Long-term training studies, however, are not well-suited to investigating individual differences in plasticity because variability can be shaped by differences in practice intensity, or by differences in lifestyle factors that influence brain health, including sleep and stress<sup>40,41</sup>. Short-term training may be a better diagnostic tool for measuring an individual's ability to change in response to practice. Indeed, a few studies have shown that 30-60 minutes of working memory practice is sufficient to cause decreases in FPS activation<sup>42-44</sup>, but these studies were too small to investigate individual differences in learning. Another study with a larger sample found that positive functional connectivity within the FPS and in other task-positive systems predicted greater learning from 80-90 minutes of working memory practice<sup>45</sup>. Further, in a motor learning task, greater learning was associated with temporal flexibility of functional modules<sup>46</sup> and training-related release of coordinated activity across task-extraneous areas<sup>47</sup>. However, these measures are difficult to link to cellular markers of plasticity.

Here, we examined whether proxy measures of frontoparietal system (FPS) plasticity at baseline predicted individual differences in learning following short-term, adaptive working memory training. We identified FPS regions involved in working memory with an *n*-back task, a commonly-used localizer for frontoparietal activation<sup>48</sup>. As a proxy for dopamine system connectivity, we analyzed resting-state functional connectivity between the VTA and task-active regions. Resting-state functional connectivity is thought to reflect a prior history of coactivation between regions, without confounding effects of task performance<sup>49</sup>. As a proxy measure for myelin, we examined “myelin map” values, defined as the ratio of T1-weighted to T2-weighted signal intensities, in task-active regions<sup>50,51</sup>. We tested two hypotheses: 1) stronger functional connectivity between the VTA and FPS regions at baseline predicts greater learning following training and 2) lower myelin map values in FPS regions at baseline predicts greater learning following training. Because neuroplasticity can be conceptualized as both the process of brain change and the brain's ability to change, we additionally explored changes in FPS structure and function, and whether these brain changes related to learning.

## Methods

### *Ethics Statement*

This study was approved by the University of Pennsylvania's Institutional Review Board. Written informed consent was obtained from all participants.

### *Participants*

Participants between the ages of 18 and 25 years were recruited through the University of Pennsylvania study recruitment system, as well as through community and university advertisements. Inclusion criteria included fluency in English, no history of psychiatric or neurological disorders or learning disabilities, no current or recent illegal substance use, and no contraindications for MRI.

In total, MRI scans were completed for 61 participants. Forty-six participants were included in the final sample ( $M = 21.39$  years,  $SD = 1.91$  years; 63% female), which met a predetermined target set by a power analysis indicating that such a sample size would have 80% power to detect a correlation between brain measures and learning of  $r = 0.4$ . Participants were excluded for falling asleep during the  $n$ -back scan ( $n = 3$ ), low performance on the control condition of the fMRI  $n$ -back task ( $< 90\%$  accuracy on the 1-back condition;  $n = 5$ ), failure to advance beyond the initial working memory condition during the 50-minute training period ( $n = 1$ ), recent illegal substance use not reported during screening but reported during participation ( $n = 1$ ), inability to tolerate scanning ( $n = 1$ ), and technical issues (total  $n = 4$ ; button box malfunction [ $n = 2$ ], coil error [ $n = 1$ ], no behavioral log files [ $n = 1$ ]). The final sample was ethnically and racially diverse (24% Asian, 33% Black, 17% Hispanic/Latino, 4% Multi-Racial, and 19% White; one participant chose not to report their race and ethnicity). 77% of participants were undergraduate students and 18% were graduate students at the University of Pennsylvania.

### ***Experimental Design and Statistical Analyses.***

#### *Learning measure*

Participants completed an auditory  $n$ -back task outside of the scanner: once before and once after adaptive  $n$ -back training. The task consisted of four blocks of trials at each of 3 cognitive conditions: 2-, 3- and 4-back (alternating in that order) for a total of 12 blocks. Each of the 12 blocks contained 24 trials. Stimuli were drawn from a pool of eight consonants ('C', 'D', 'G', 'K', 'P', 'Q', 'T', and 'V'). Within each condition, approximately 15% of all trials were targets. At the beginning of each block, the current  $n$ -back condition was presented in the center of a black screen for 2500 ms, after which the response options "YES" and "NO" appeared. Then, an audio clip of a single consonant played for 500 ms. Participants were given 2000 ms to respond via button press on a standard keyboard: "F" for "YES" responses and "J" for "NO" responses. Each block was followed by 10 seconds of rest. Feedback was provided such that accurate or inaccurate responses prompted the correct response option to be highlighted in green or red, respectively. Two primary indices of learning were analyzed for ease of interpretation: (1) the change in task accuracy across trials, as defined by the percentage change of correctly-answered trials, and (2) the change in response time across trials.

#### *n-Back Training*

Participants completed a 50-minute adaptive  $n$ -back task during the training period. The 50-minute duration was selected based on studies that have shown fMRI activation changes following 30-60 minutes of training<sup>42-44</sup>, and because longer training would likely induce fatigue. The training session was self-paced. Syllables were used during the training period, in contrast to the pre- and post-training assessments, to reduce the likelihood that learning was based on perceptual changes alone. Stimuli were drawn from a pool of eight syllables ('ba,' 'cha,' 'da,' 'fa,' 'ga,' 'ja,' 'ka,' and 'la'). Within each condition, approximately 13% of all trials were targets. The training session began at the 2-back condition; participants progressed to the next-highest task condition if they finished blocks at or above 90% accuracy, remained at the same task condition



if they finished blocks with 71-89% accuracy, and regressed to the next lowest condition (min: 2-back) if they finished blocks with 70% accuracy or below. Each block at each condition consisted of 24 trials. Participants completed a mean of 745 trials (31.1 blocks) and reached, on average, the 5-back condition (Figure 1B; min: 3-back, max: 13-back) during the training period.

### *Neuroimaging Data Acquisition*

Imaging was performed at the Center for Magnetic Resonance Imaging & Spectroscopy at the University of Pennsylvania with a Siemens MAGNETOM Prisma 3T MRI Scanner (Siemens, Erlangen, Germany) using a 32-channel head coil. Each participant underwent two MRI scans: the first scan was completed before the *n*-back training period and the second scan was completed following training. During both the pre- and post-training scan sessions, participants completed an identical series of scans, which included T1- and T2-weighted structural scans, a five-minute resting-state scan, and a five-minute *n*-back task. First, whole-brain, high-resolution, T1-weighted (T1-w) multi-echo (MEMPRAGE, TR = 2530 ms; TEs = 1.69, 3.55, 5.41, 7.27 ms; flip angle = 7°; resolution = 1 mm isotropic) and T2-weighted (T2-w) structural scans (T2SPACE, TR = 3200 ms; TE = 406 ms; resolution = 1 mm isotropic; turbo factor: 282) were collected with volumetric navigators<sup>52</sup>. We collected a T2SPACE scan<sup>51</sup>, but note that this sequence is not a pure T2-w scan. The participants viewed a nature documentary during the structural scans. Next, a five-minute run of resting-state fMRI data was acquired (TR = 2000 ms; TEs = 30.20 ms; flip angle = 90°; resolution = 2 mm isotropic). Participants looked at a fixation cross throughout the scan. Scanning continued until at least 5 minutes of data were acquired with framewise displacement < 0.5 mm. Finally, an *n*-back fMRI scan was acquired (TR = 2000 ms, TE = 30.2 ms, flip angle = 90°, voxel size = 2.0 x 2.0 x 2.0 mm, matrix size = 96 x 96 x 75, 75 axial slices, 170 volumes, field of view = 192 mm). For both EPI sequences, the first four volumes of each scan were automatically discarded to allow time for scanner magnetization to reach equilibrium.

### *fMRI n-Back Task*

The fMRI *n*-back task consisted of four 30-second blocks alternating between 1- and 2-back conditions with 12 trials per block. Each block was followed by 10 seconds of rest. Consonant stimuli were presented for 500 ms and participants were given 2000 ms to respond. The fMRI *n*-back task was designed as a FPS localizer; therefore, only 1- and 2-back conditions were used during the fMRI task to maximize accuracy and minimize confounding effects of errors. As a result, the task was not designed to be sensitive to improvements in accuracy associated with training. By design, accuracy on the fMRI *n*-back task was high at baseline (1-back accuracy:  $M = 97.8\%$ ,  $SD = 1.9\%$ ; 2-back accuracy:  $M = 96.9\%$ ,  $SD = 3.5\%$ ), and improved from baseline to post-test only during the 2-back condition (1-back:  $t = 0.96$ ,  $p = .34$ ; 2-back:  $t = 2.56$ ,  $p = .01$ ). Response times on the fMRI *n*-back task decreased significantly with training (1-back:  $t = -6.43$ ,  $p < .0001$ ; 2-back:  $t = -3.16$ ,  $p = .002$ ).

### *Data Processing and Analysis*

### *Task-based fMRI analyses and region-of-interest (ROI) definition*

Preprocessing for the task fMRI data was implemented using FEAT (FMRI Expert Analysis Tool) Version 6.00, part of FSL (FMRIB's Software Library, [www.fmrib.ox.ac.uk/fsl](http://www.fmrib.ox.ac.uk/fsl)). The following steps were applied: motion correction using MCFLIRT<sup>53</sup>, skull stripping, spatial smoothing using a Gaussian kernel of FWHM 5 mm, and high-pass temporal filtering (100s). Functional data were normalized to the MNI template during a two-step process using FLIRT (FMRIB's Linear Image Registration Tool) in FEAT. First, each participant's functional image was co-registered to their anatomical T1-w structural image using FSL's Boundary-Based Registration feature (BBR)<sup>54</sup>. Second, the anatomical image was warped to the standard 2 mm MNI152 structural template. Finally, both of these transformations were combined and used to normalize the functional image to standard MNI space<sup>55</sup>. Average framewise displacement across the pre-training  $n$ -back run was not significantly different from motion across the post-training run ( $t = .25$ ,  $p = .80$ ). No included participants had average head motion greater than 0.15 mm across either the pre- or post-training runs of the  $n$ -back task.

At the single-subject level, we created a general linear model (GLM) for each participant that included the following regressors: 1- and 2-back blocks convolved with the double-gamma hemodynamic response function and their temporal derivatives, as well as FSL's standard and extended motion parameters (global signal, 6 motion parameters and their temporal derivatives, quadratic terms, and the temporal derivatives of the quadratic terms). For both the pre- and post-training scans, these maps were generated for the three contrasts of interest: 1-back > 0-back, 2-back > 0-back, and 2-back > 1-back. The 1-back contrast is a continuous performance task with sustained attentional demands and minimal WM demands, and the 2-back contrast is identical but has increased WM demand. We examined changes in overall task engagement on the low and higher WM demand conditions, and also changes in differential activation, thereby isolating the WM demands.

We conducted mixed-effects analyses in FEAT (FLAME 1) to create group-level maps for each of the three contrasts of interest (1-back; 2-back; 2 > 1-back) for Pre-training-only, Post-training-only, and Pre-training > Post-training. Group-level z-statistic images were thresholded using clusters determined by  $z > 3.1$  and a corrected cluster significance threshold of  $p = 0.05$ <sup>56</sup>. Results were registered to the Freesurfer *fsaverage* surface and projected to the cortical surface using *mri\_vol2surf* for visualization (Freesurfer v6.0)<sup>57</sup>.

To identify task-active regions at baseline, we used the results of the whole-brain analysis of the 2-back > 1-back contrast from the pre-training scan at a threshold of  $z = 4.0$  to create five regions of interest (ROIs): the left and right lateral prefrontal cortex (left and right LPFC), the bilateral medial prefrontal cortex (mPFC), the bilateral parietal cortex (including medial parietal regions), and the dorsal striatum.

### *Resting-state analyses*



Resting-state data were preprocessed with a different pipeline than the one used for the task-based data in order to incorporate Nipype, a Python-based framework specifically optimized for flexibly integrating resting-state analysis tools<sup>58</sup>. The software packages used in this preprocessing pipeline included FMRIB Software Library (FSL v5.0.8)<sup>59</sup>, FreeSurfer (v6.0)<sup>57</sup>, Advanced Normalization Tools (ANTs v2.1.0;)<sup>60</sup>, and Nipype's implementation of Artifact Detection Tools (ART; [http://www.nitrc.org/projects/artifact\\_detect/](http://www.nitrc.org/projects/artifact_detect/)). Simultaneous realignment and slice timing correction were conducted using an algorithm implemented in Nipy<sup>61</sup>. Outlier volumes in the resting-state data were defined using ART based on composite motion (> 0.5 mm of head displacement between volumes) and global signal intensity (> 3 SD from the mean). Participants had average composite head motion of < 0.2 mm ( $M = 0.11$  mm,  $SD = 0.06$  mm) across resting-state runs.

The resting-state data were then bandpass filtered (0.01–0.1 Hz), spatially smoothed with an isotropic 6 mm Gaussian kernel (FWHM), and normalized to the OASIS-30 Atropos template (in MNI152 2 mm space) in a two-step process. First, the median functional image was coregistered to the reconstructed surfaces using FreeSurfer's *bbregister*<sup>54</sup>; second, the structural image was registered to the OASIS-30 Atropos MNI152 template using ANTs. The transformation matrices generated by these two steps were then concatenated, allowing images to be transformed directly from functional to MNI space in a single interpolation step. The CSF and white matter segmentations were derived from FreeSurfer's individual segmentations of the lateral ventricles and total white matter, respectively, and were transformed into functional space. Five principal components were derived from both segmentations and regressed from the resting-state data, in order to correct for physiological noise like heart rate and respiration (aCompCor)<sup>62</sup>. At the single-subject level, the following confounds were regressed out: 6 realignment parameters (3 translations, 3 rotations) and their first-order derivatives, outlier volumes flagged by ART (one nuisance regressor per outlier), composite motion, 5 principal components from aCompCor, and linear and quadratic polynomials in order to detrend the data. Global signal was not regressed out during these analyses.

The VTA ROI was defined using a probabilistic atlas<sup>63</sup>. The average time series of the VTA seed was extracted from unsmoothed functional data and correlated with the average time series from within each of the five task-based ROIs, both before and after training. VTA connectivity with the other ROIs was not related to age, sex, total number of volumes or outliers, or motion ( $p$ -values > 0.05); nonetheless, we controlled for these measures in all models to ensure that they did not drive relationships with learning. All results of resting-state analyses are the same with and without these covariates of no interest.

### *Myelin maps*

We calculated the ratio between each participant's T1-w and T2-w images to create subject-specific myelin-enhanced contrast images, or "myelin maps"<sup>51</sup>, using the publicly available *MRTTool* toolbox (version 1.4.3; <https://www.nitrc.org/projects/mrtool/>)<sup>50,64</sup> for SPM12.

The steps taken by *MRTool* to generate each participant's myelin map are delineated below. First, each participant's T2-w image was coregistered to their T1-w image using a rigid-body transformation<sup>9,65</sup>. Both images then underwent bias correction to ensure spatial equalization of the coil sensitivity profiles. The intensity inhomogeneity correction tool in SPM12 was separately used on both images to correct for transmission-field inhomogeneities in image intensity and contrast<sup>9</sup>. Subsequently, the intensity values of both bias-corrected images were separately standardized using a non-linear external calibration approach (*MRTool* image calibration option #1: Nonlinear histogram matching – external calibration), in order to accurately capture inter-individual differences in myelin contrast<sup>50,64</sup>. This was a three-step process: (i) subject-specific masks corresponding to CSF, skull, and soft tissues (i.e., dura mater) were extracted using SPM's Segmentation tool in both anatomical (T1-w) and template (MNI) space, (ii) intensity histograms for all three masks were generated in both spaces and a non-linear mapping function (cubic spline interpolation) between them was computed, and (iii) the corresponding cubic polynomial was used to calibrate the intensities of the bias-corrected T1-w and T2-w images. Lastly, the ratio between each participant's bias-corrected and calibrated T1-w and T2-w images was calculated, as a proxy for their corresponding "myelin map"<sup>51</sup>.

We then masked out CSF and white matter (as defined by individual segmentations in Freesurfer's LookUp Table)<sup>66–68</sup> from the myelin maps to ensure that extracted values for the ROIs reflected only gray matter. The five task-based ROIs (created in MNI space) were inverse-transformed to each subject's structural space with ANTs<sup>60</sup>. Finally, myelin map values (T1-w/T2-w ratio intensities) were extracted from each ROI for each subject, both before and after training.

#### *Data Availability Statement*

Behavioral data, values extracted from neuroimaging data, code used to collect functional task data, and code necessary to replicate results are freely available at <https://github.com/austinboroshok/frontoparietal-plasticity>. Deidentified neuroimaging data in BIDS format are freely available at <https://openneuro.org/datasets/ds003849/versions/1.0.0>.

## Results

All statistical analyses were performed using *R* (version 4.05) and *RStudio* (version 1.4.1106) software (*R* Foundation for Statistical Computing, Vienna, Austria).

### ***Working memory performance improved with training.***

We considered two behavioral measures of learning: accuracy change and response time (RT) change on the out-of-scanner pre- and post-training *n*-back task (Figure 1A). Fifty minutes of training led to small but significant increases in accuracy and decreases in response times (Table 1). However, there was considerable variability in training gains among individuals (Figure 1B-D). Individuals with lower baseline accuracy improved more on accuracy following training ( $\beta = -0.284$ , 95% CI [-0.493, -0.076],  $p = .009$ ). Individuals with slower baseline response times showed swifter response times following training ( $\beta = -0.389$ , 95% CI [-0.563, -

0.215],  $p < .001$ ). Gains in accuracy were not associated with improvements in response times ( $\beta = 0.050$ , 95% CI [-0.045, 0.145],  $p = .291$ ). Improvements in learning were not associated with age (accuracy:  $\beta = -0.003$ , 95% CI [-0.008, 0.002],  $p = .217$ ; RT:  $\beta = 0.008$ , 95% CI [-0.008, 0.023],  $p = .306$ ) or sex (accuracy:  $\beta = 0.019$ , 95% CI [0.000, 0.039],  $p = .055$ ; RT:  $\beta = 0.002$ , 95% CI [-0.061, 0.065],  $p = .955$ ), controlling for baseline performance. The highest  $n$ -back condition reached during training was not used in brain analyses because the distribution was significantly non-parametric (Shapiro-Wilk:  $W = 0.81$ ,  $p < .001$ ), due to a small number of participants reaching very high conditions (Figure 1B).

***Stronger VTA connectivity at baseline predicted greater improvements in accuracy following training.***

We used functional connectivity between the VTA and the task-based FPS regions of interest as a proxy measure for dopamine system connectivity. Consistent with the hypothesis that greater strength of dopamine system connectivity is associated with greater learning, we found that stronger resting-state functional connectivity between the VTA and the bilateral LPFC at baseline predicted greater improvements in accuracy (Figure 2B-C: left LPFC:  $\beta = 0.067$ , 95% CI [0.011, 0.123],  $p = .020$ ,  $pFDR = .23$ ; right LPFC:  $\beta = 0.086$ , 95% CI [0.027, 0.146],  $p = .006$ ;  $pFDR = .056$ ), controlling for baseline accuracy, age, sex, motion, and total number of volumes. There were no significant associations between accuracy gains and VTA connectivity with the mPFC ( $\beta = 0.004$ , 95% CI [-0.057, 0.064],  $p = .906$ ), the parietal cortex ( $\beta = 0.019$ , 95% CI [-0.042, 0.079],  $p = .537$ ), or the striatum ( $\beta = 0.050$ , 95% CI [-0.008, 0.108],  $p = .091$ ). Further, there were no significant associations between VTA-FPS connectivity and changes in response times, and VTA connectivity was not associated with accuracy or response times at baseline.

***Lower T1-w/T2-w ratios at baseline predicted greater improvements in response times following training.***

We used the ratio of T1-w/T2-w intensities as a proxy measure for myelination (Figure 3A). Individuals with lower baseline T1-w/T2-w ratios in all five FPS regions of interest showed greater improvements in response times (Figure 3B-G: left LPFC:  $\beta = 0.423$ , 95% CI [0.127, 0.719],  $p = .006$ ,  $pFDR = .02$ ; right LPFC:  $\beta = 0.425$ , 95% CI [0.131, 0.718],  $p = .006$ ,  $pFDR = .02$ ; mPFC:  $\beta = 0.318$ , 95% CI [0.016, 0.620],  $p = .039$ ,  $pFDR = .078$ ; parietal cortex:  $\beta = 0.410$ , 95% CI [0.112, 0.708],  $p = .008$ ,  $pFDR = .02$ ; and striatum:  $\beta = 0.411$ , 95% CI [0.138, 0.684],  $p = .004$ ,  $pFDR = .02$ ), while controlling for baseline response times, age, and sex. T1-w/T2-w ratios were not associated with accuracy improvement. Lower baseline T1-w/T2-w ratios in striatum were related to faster response times at baseline ( $\beta = 0.491$ , 95% CI [0.004, 0.979],  $p = .048$ ), while controlling for age and sex. Associations between T1-w/T2-w ratios and baseline response times in the other three FPS regions of interest were trending toward significance (left LPFC:  $\beta = 0.467$ , 95% CI [-0.069, 1.002],  $p = .086$ ; right LPFC:  $\beta = 0.444$ , 95% CI [-0.092, 0.979],  $p = .102$ ; parietal cortex:  $\beta = 0.469$ , 95% CI [-0.066, 1.004],  $p = .084$ ). T1w-/T2-w ratios were not associated with accuracy at baseline.

***Brain activation changes with training were small and not strongly associated with learning.***

Brain activation during the working memory task during each timepoint and activation averaged across timepoints is shown in Figure 4A-C. Working memory training was associated with bilateral decreases in FPS activation in the 1- and 2-back contrasts (Figure 4 D-E), but not in the 2-back > 1-back contrast. No regions showed significant increases in activation across timepoints in any contrasts. We did not observe training-related changes in VTA connectivity, or in T1-w/T2-w ratios (Table S1). Brain changes were not associated with learning. Relationships among brain change measures and learning for all regions of interest are shown in Supplemental Figure 2.

## Discussion

We investigated whether individual differences in the structure and function of the frontoparietal system predicted learning in healthy human adults. We focused on proxy measures of two properties that have been shown to influence the brain's ability to change in animal models: ventral tegmental area (VTA) functional connectivity and myelin maps. Adults, on average, improved their accuracy and response times after 50 minutes of practice on an adaptive *n*-back task, and there were large individual differences in learning. Improvements in accuracy were positively associated with resting-state functional connectivity between the VTA and the bilateral lateral prefrontal cortex (LPFC) at baseline. Improvements in response times were negatively associated with myelin map values for all frontal, parietal, and striatal regions of interest.

The finding that stronger functional connectivity between the VTA and the LPFC predicted greater accuracy gains is consistent with work in animal models showing that dopamine promotes synaptic plasticity<sup>2,69,70</sup>. One interpretation of our findings is that individuals with stronger connectivity between the dopamine system and the LPFC are better able to learn an LPFC-dependent task (i.e., a working memory task)<sup>71</sup> because they have greater synaptic plasticity in these regions, or are better able to modulate synaptic plasticity. Indeed, a few experimental and computational modeling studies have suggested that synaptic plasticity in the LPFC is key for working memory<sup>20,72-74</sup>. Another interpretation is that individuals with greater top-down control from the LPFC to the VTA are better able to learn because they can better upregulate a range of motivational processes including effort. A third interpretation is that greater VTA-LPFC connectivity reflects a history of coactivation of these regions, perhaps because an individual has more experience learning novel prefrontally-dependent tasks. In rats, the VTA and the PFC show simultaneous and significant increases in firing rate at the same phases of a learning task<sup>75</sup>. In the present study, it is not the case that VTA-LPFC connectivity is simply a marker of better working memory: VTA-LPFC connectivity was not associated with baseline working memory, and all statistical models predicting working memory change with VTA-LPFC connectivity controlled for baseline working memory. However, resting-state fMRI cannot distinguish between top-down control of the VTA by the LPFC and bottom-up innervation of the LPFC by the VTA, and it also cannot distinguish between dopamine system connectivity and excitatory, or even inhibitory, transmission. Although rs-fMRI leaves open some questions about possible interpretations of our results, VTA connectivity is nevertheless a promising marker of how well adults will learn a frontoparietal task, with potential broader extensions to

measuring individual differences in plasticity across other brain systems. Convergent data from PET imaging or pharmacological manipulation of dopamine would strengthen these results.

The observation that individuals with lower T1-w-T2-w ratio values in the FPS (a proxy for myelination in this system) at baseline showed the biggest improvements in response time following training is consistent with work in animal models suggesting that lower myelination is associated with greater plasticity<sup>3,76</sup>. That less-myelinated individuals were able to improve their response time without sacrificing their accuracy on the *n*-back task, even controlling for baseline performance, alleviates concerns about a speed-accuracy tradeoff effect whereby individuals are simply responding faster and less carefully due to increased familiarity with the task or decreased effort following training, leading to a high error rate and a false interpretation that faster response times are reflective of learning. It remains unclear why our two proxy measures of neuroplasticity were differentially related to the two learning measures. It is possible that the brain measures reflected differences in strategy or approach to the learning task, or that the behavioral outcome measures were sensitive to different learning processes. More work is needed to understand why some individuals show accuracy gains and others show speed gains.

Training was associated with decreases in task activation in both the 1-back and 2-back conditions, which is consistent with prior work showing activation reductions with short-term and long-term working memory practice<sup>19,23,24,31,43,44</sup>. However, there were no changes in the 2-back > 1-back contrast, or in any of the other brain measures examined here. Further, training-related changes in neural measures were broadly not associated with learning gains. It is possible that individuals take different strategies to learn the *n*-back task, and these strategies result in heterogeneous changes in structure and function. It is also possible that changes from short-term learning are too small to be reflected in the neural measures we selected.

The current study has several limitations. First, the observed relationships between VTA-LPFC connectivity and learning were not strong enough to survive correction for multiple comparisons. Thus, replication of these results is necessary. Second, we conducted analyses that were narrowly tailored to our specific hypotheses about plasticity, but the multimodal data set that we have collected lends itself to additional data-driven analyses, for example asking whether baseline connectivity within the FPS predicts learning<sup>45</sup>. We share all behavioral and imaging data to facilitate this future work. Third, the study was designed to characterize how brain features predict individual differences in learning, not to test for main effects of working memory training on neural measures, so it did not include a control group. A control group that practiced an unrelated task could further illuminate the specificity of the relationships presented here. For example, a control group could be used to answer the question: Does VTA-LPFC connectivity predict accuracy gains on a task that does not engage LPFC? Fourth, we only collected five minutes of resting-state fMRI data from each participant, which may limit the reliability of the VTA-LPFC connectivity findings<sup>77</sup>. Fifth, our sample included predominantly undergraduate and graduate students, so it may not reflect the variability in cognition and learning that is present in the American population or in the broader world. Finally, learning during the working memory

task likely depends not only on the plasticity of the frontal, parietal, and striatal regions, but also on individual differences in effort, attention, strategy choice, or susceptibility to fatigue.

In sum, individuals with stronger connectivity between VTA and lateral prefrontal cortex, as well as individuals with lower myelin map values, showed greater learning from short-term practice. Our study underscores the opportunities and challenges of using neuroimaging tools to measure frontoparietal system plasticity in humans. Better measures of human brain plasticity would enable investigations of the experiences and lifestyle factors that increase plasticity in adulthood, for example stress<sup>78</sup>, sleep<sup>79,80</sup>, or novel positive experiences<sup>81,82</sup>. MRI measures of plasticity are also necessary for tackling questions about how early life experiences shape plasticity, with implications ranging from learning in school to response to cognitive behavioral therapies. Thus, a deeper understanding of human neuroplasticity may help optimize neurocognitive, educational, and psychological interventions that aim to improve well-being and experience across the lifespan.



## Figure Legends

**Figure 1. Individual differences in training performance and task improvement.** (A) Schematic of study design. (B) Highest  $n$ -back condition achieved during training. (C) Task performance on the out-of-scanner pre- and post-training  $n$ -back task, measured by accuracy (or percentage of correct trials), averaged across task conditions (left panel) and response time (in seconds) averaged across task conditions (right panel). Vertical dashed lines represent mean values. (D) Individual differences in out-of-scanner  $n$ -back accuracy and response time (averaged across conditions) changes. Each colored line represents an individual participant.

**Figure 2. Correlations between functional connectivity between the ventral tegmental area (VTA) and the lateral prefrontal cortex (LPFC) and improvements in accuracy.** (A) Schematic of correlation between BOLD time series at rest of regions of interest with changes in accuracy. Colored lines represent the time series of positive functional connectivity between the VTA and the LPFC at rest. (B) Positive relationships between baseline VTA-left LPFC resting-state functional connectivity (rs-FC) and accuracy gains on the  $n$ -back working memory task. (C) Positive relationships between baseline VTA-right LPFC rs-FC and accuracy gains on the  $n$ -back working memory task. Statistical models control for age, sex, motion, and baseline working memory accuracy.

**Figure 3. Correlations between frontoparietal T1-w/T2-w signal intensity ratio and training-related changes in response time.** (A) Schematic of T1 signal intensity divided by T2 signal intensity. (B) Task-based regions of interest (C-G) Positive relationships between baseline frontoparietal T1-w/T2-w signal intensity ratio and training-related changes in response times on the  $n$ -back working memory task. Axial slice is  $z = 22$ . Statistical models control for age, sex, and baseline working memory response times. Asterisks denote  $p$ -values that survive FDR-correction.

**Figure 4. Task activation both before and after adaptive  $n$ -back practice.** Average frontoparietal functional activation for the (A) 1-back > 0-back, (B) 2-back > 0-back, and (C) 2-back > 1-back contrasts. Activation at baseline (pre-training) is shown in yellow, activation post-training is shown in red, and their overlap is shown in orange. Panels A-C are corrected for multiple comparisons at  $z = 4.0$ ,  $p < 0.05$ . Axial slices are shown for  $z = 22$ . Panels D and E show significant decreases in activation from pre- to post-training for the (D) 1-back > 0-back and (E) 2-back > 0-back contrasts. No subcortical regions showed a significant change for any condition, and no regions showed a change for the 2-back > 1-back contrast. Panels D and E are corrected for multiple comparisons at  $z = 3.1$ ,  $p < 0.05$ .

Figure 1.

### A. Study Design

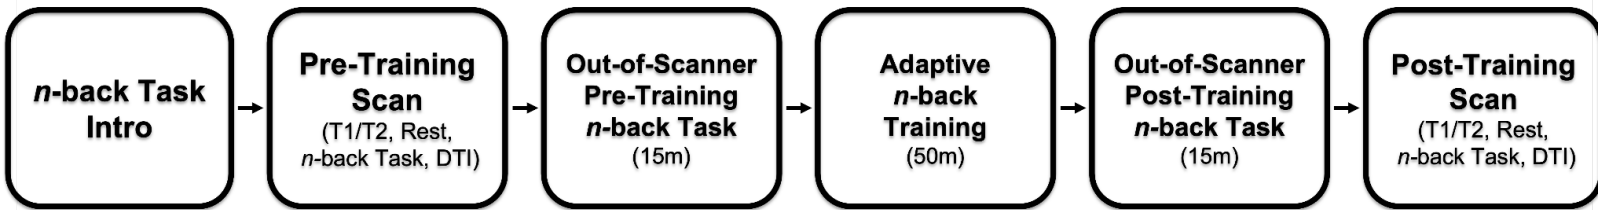

### B. n-back Training Performance

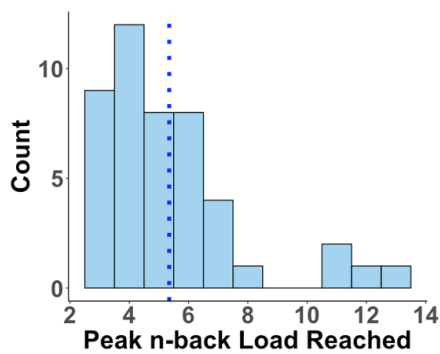

### C. Out-of-Scanner n-back Performance

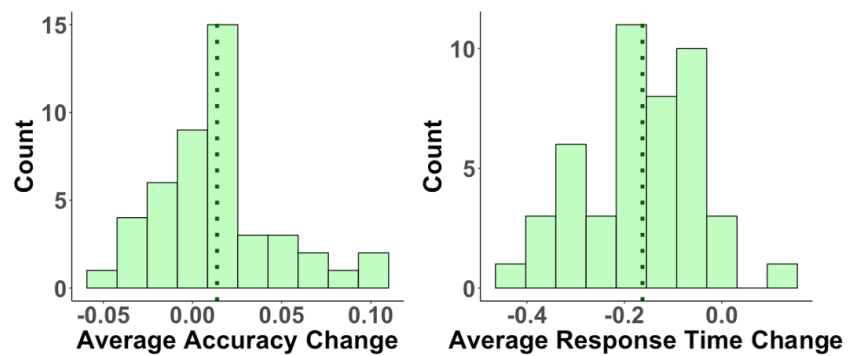

### D. Individual Differences in Task Improvement

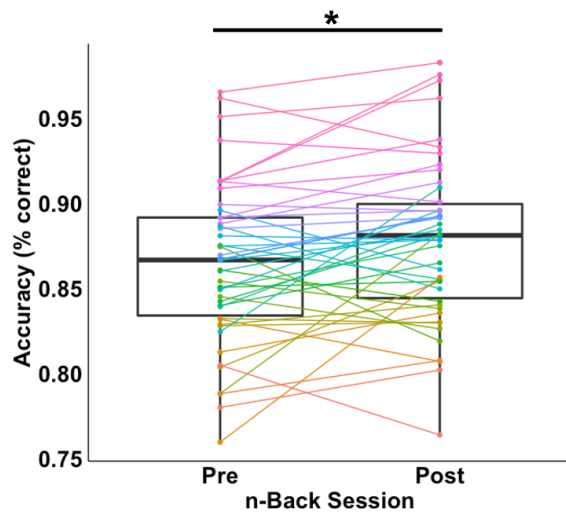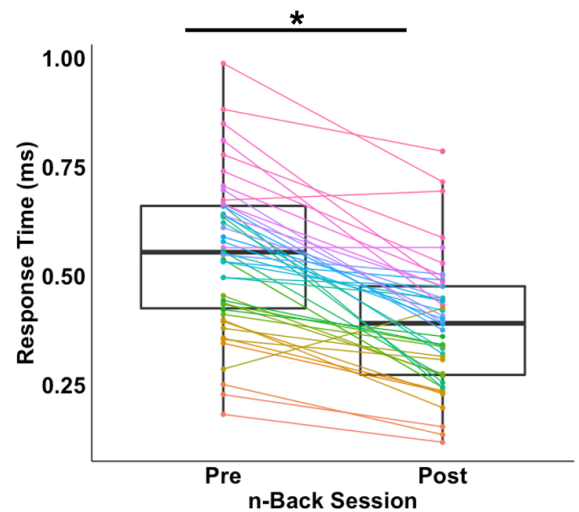

Figure 2.

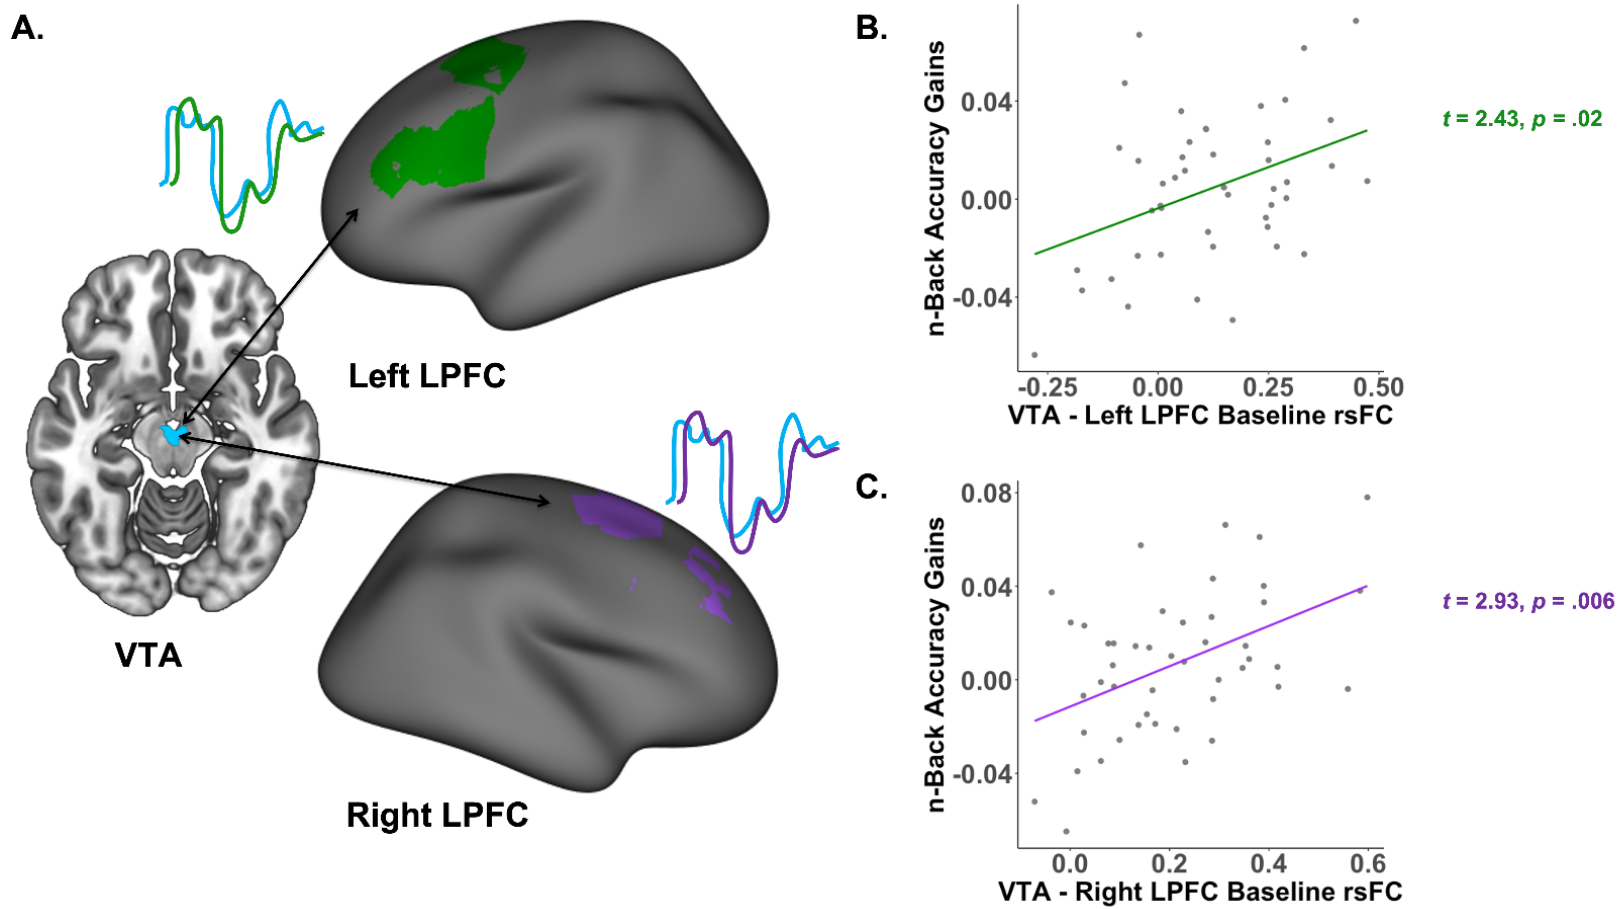

Figure 3.

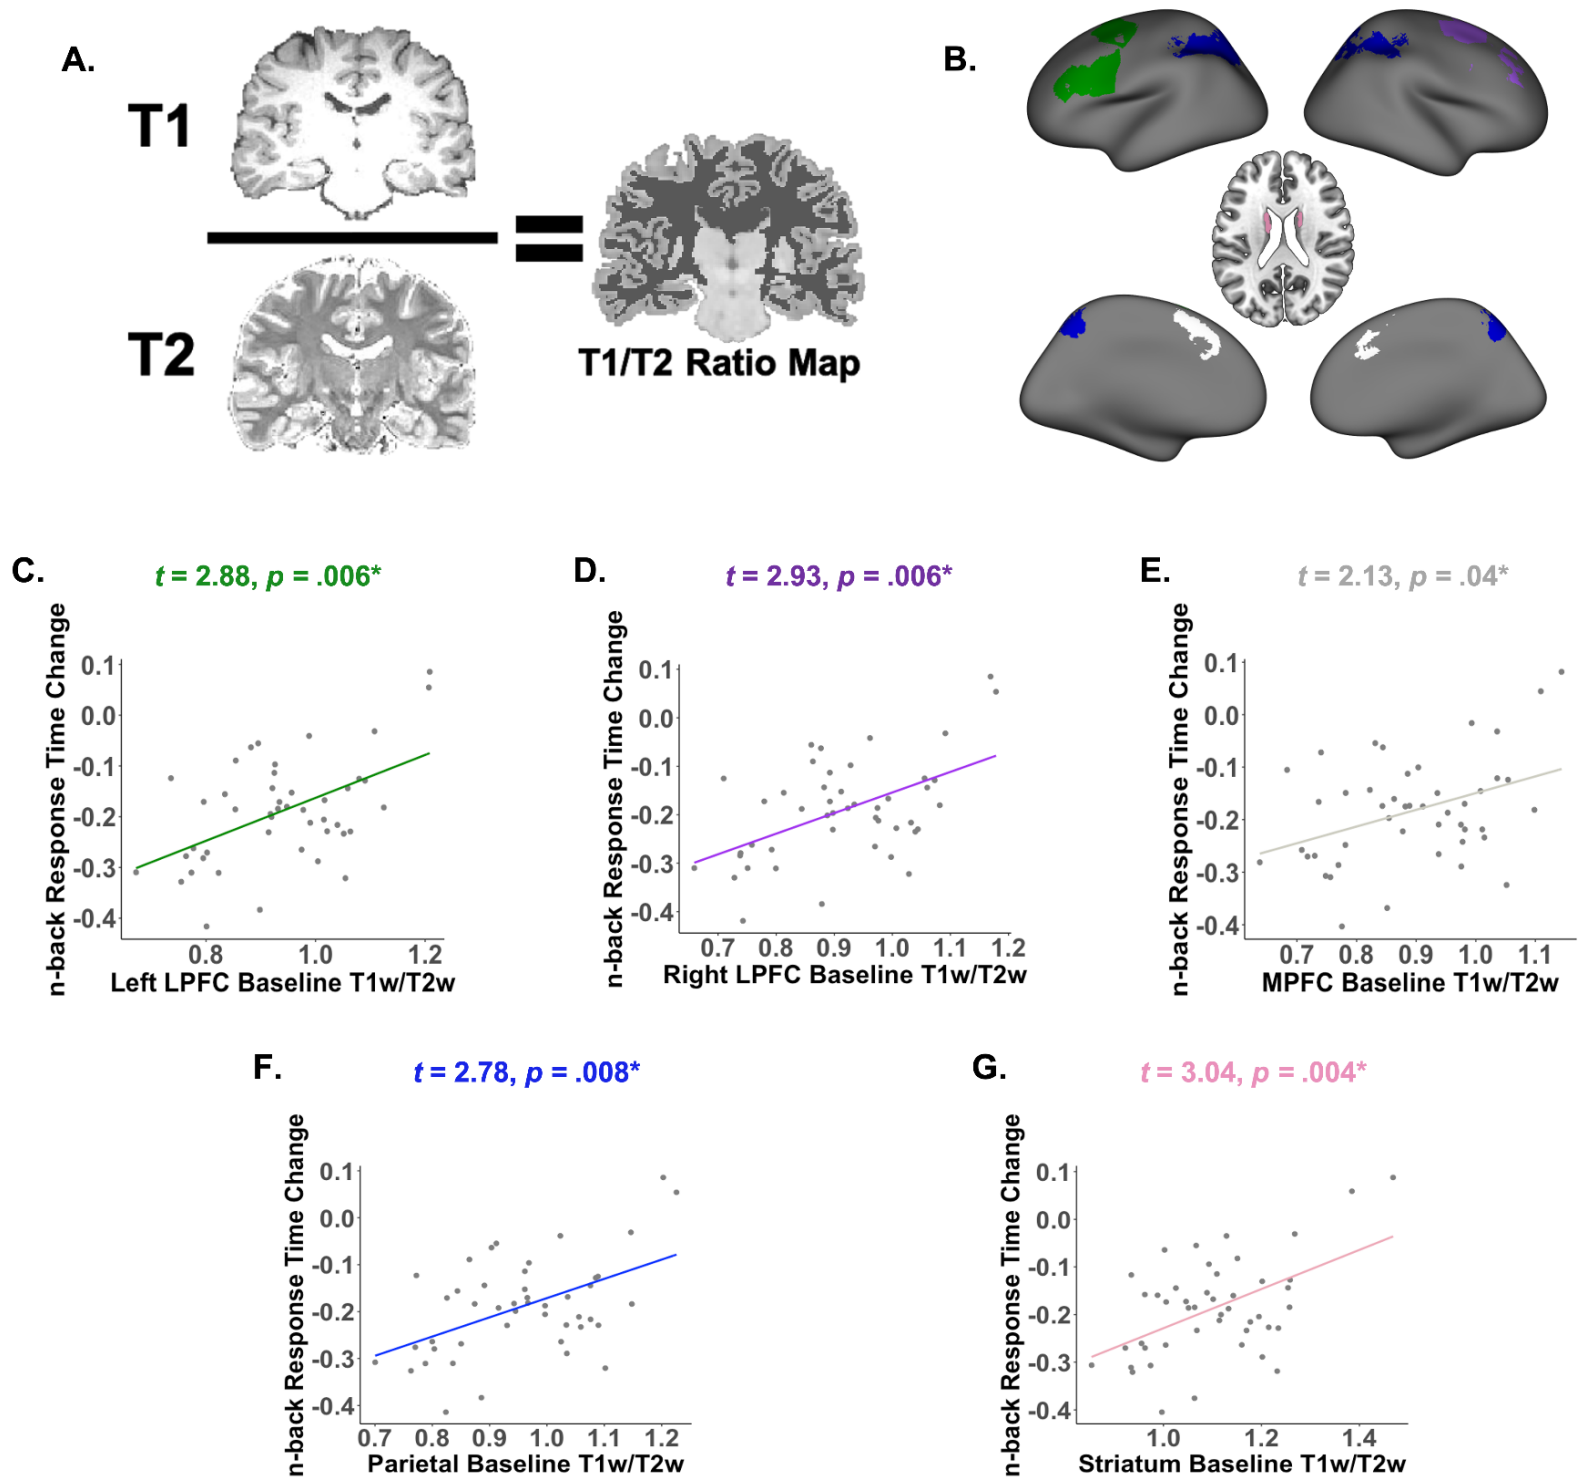

Figure 4.

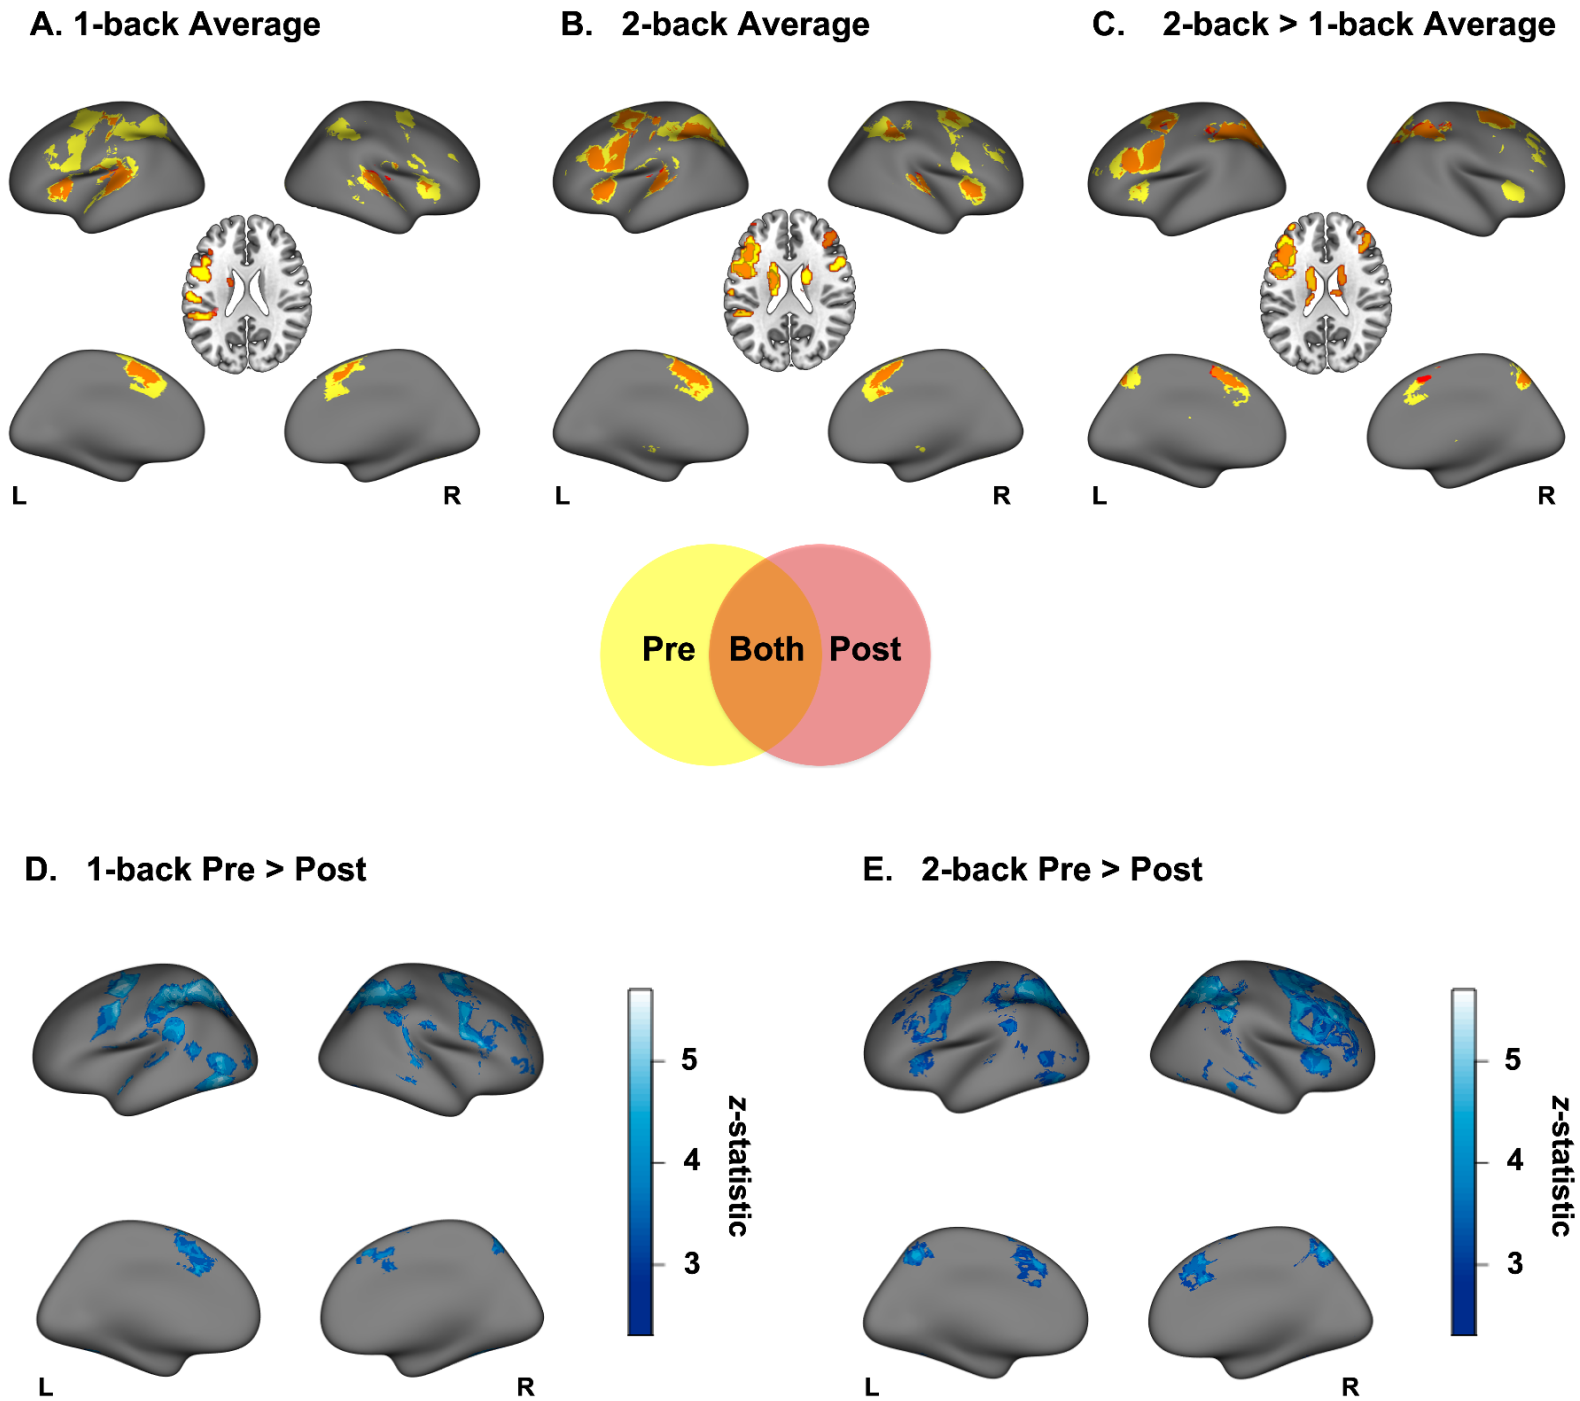

Table 1.

|                          | 2-back                           |                                   |                                     | 3-back                           |                                   |                                     | 4-back                           |                                   |                                     | Average                          |                                   |                                     |
|--------------------------|----------------------------------|-----------------------------------|-------------------------------------|----------------------------------|-----------------------------------|-------------------------------------|----------------------------------|-----------------------------------|-------------------------------------|----------------------------------|-----------------------------------|-------------------------------------|
|                          | Pre<br><i>M</i><br>( <i>SD</i> ) | Post<br><i>M</i><br>( <i>SD</i> ) | Change<br><i>M</i><br>( <i>SD</i> ) | Pre<br><i>M</i><br>( <i>SD</i> ) | Post<br><i>M</i><br>( <i>SD</i> ) | Change<br><i>M</i><br>( <i>SD</i> ) | Pre<br><i>M</i><br>( <i>SD</i> ) | Post<br><i>M</i><br>( <i>SD</i> ) | Change<br><i>M</i><br>( <i>SD</i> ) | Pre<br><i>M</i><br>( <i>SD</i> ) | Post<br><i>M</i><br>( <i>SD</i> ) | Change<br><i>M</i><br>( <i>SD</i> ) |
| <b>Accuracy (%)</b>      | 92.2<br>(.05)                    | 94.2<br>(.04)                     | <b>.02**<br/>(.04)</b>              | 85.1<br>(.06)                    | 85.6<br>(.07)                     | .004<br>(.05)                       | 82.0<br>(.06)                    | 83.7<br>(.06)                     | <b>.02*<br/>(.05)</b>               | 86.4<br>(.05)                    | 87.8<br>(.05)                     | <b>.01**<br/>(.03)</b>              |
| <b>Reaction Time (s)</b> | .50<br>(.17)                     | .39<br>(.17)                      | <b>-.11***<br/>(.12)</b>            | .60<br>(.21)                     | .42<br>(.17)                      | <b>-.18***<br/>(.16)</b>            | .55<br>(.20)                     | .35<br>(.15)                      | <b>-.20***<br/>(.17)</b>            | .57<br>(.19)                     | .41<br>(.16)                      | <b>-.16***<br/>(.13)</b>            |

**Table 1.** Behavioral performance on the out-of-scanner *n*-back task. Task accuracy is represented using percentage of correctly-answered trials, and response time is represented using seconds taken to respond to stimuli. The values for change in accuracy and response time across timepoints represent the difference between pre- and post-training means (*M*) and standard deviations (*SD*). Bolded values denote significant training-related changes, as indicated by Student's *t*-test. \* =  $p \leq 0.05$ , \*\* =  $p \leq 0.01$ , \*\*\* =  $p \leq 0.001$ .



## Supplement

|                 | <b>Pre-Training<br/><i>M (SD)</i></b> | <b>Post-Training<br/><i>M (SD)</i></b> | <b>Change<br/><i>M (SD)</i></b> |
|-----------------|---------------------------------------|----------------------------------------|---------------------------------|
| <b>VTA rsFC</b> |                                       |                                        |                                 |
| Left LPFC       | .12 (.17)                             | .08 (.19)                              | -.04 (.23)                      |
| Right LPFC      | .21 (.16)                             | .23 (.17)                              | .02 (.21)                       |
| MPFC            | .10 (.17)                             | .11 (.18)                              | .01 (.24)                       |
| Parietal        | .12 (.17)                             | .13 (.18)                              | .01 (.23)                       |
| Striatum        | .20 (.18)                             | .18 (.18)                              | -.02 (.24)                      |
| <b>MM</b>       |                                       |                                        |                                 |
| Left LPFC       | .94 (.13)                             | .93 (.12)                              | -.01 (.03)                      |
| Right LPFC      | .91 (.13)                             | .91 (.13)                              | -.001 (.04)                     |
| MPFC            | .89 (.12)                             | .88 (.12)                              | -.01 (.04)                      |
| Parietal        | .96 (.13)                             | .05 (.12)                              | -.01 (.04)                      |
| Striatum        | 1.10 (.13)                            | 1.09 (.13)                             | -.01 (.03)                      |
| <b>B</b>        |                                       |                                        |                                 |
| Left LPFC       | 27.12 (18.10)                         | 21.60 (19.92)                          | -5.52 (28.27)                   |
| Right LPFC      | 28.19 (19.69)                         | 20.60 (25.68)                          | -7.59 (31.89)                   |
| MPFC            | 19.33 (15.51)                         | 15.21 (20.01)                          | -4.11 (24.22)                   |
| Parietal        | 29.35 (21.33)                         | 27.24 (24.81)                          | -2.11 (28.18)                   |
| Striatum        | 9.48 (8.85)                           | 4.76 (11.41)                           | <b>-4.72* (14.01)</b>           |

**Supplemental Table 1.** Means and standard deviations of neural measures at baseline and following training, as well as training-related changes in these features. Bold values with an asterisk denote significant training-related changes, as indicated by Student's *t*-test. \* =  $p \leq 0.05$ . Abbreviations: lateral prefrontal cortex (LPFC), medial prefrontal cortex (MPFC), resting-state functional connectivity between the ventral tegmental area and frontoparietal regions of interest (VTA rsFC), T1-w/T2-w ratio "myelin map" values (MM), 2-back > 1-back beta values (B).

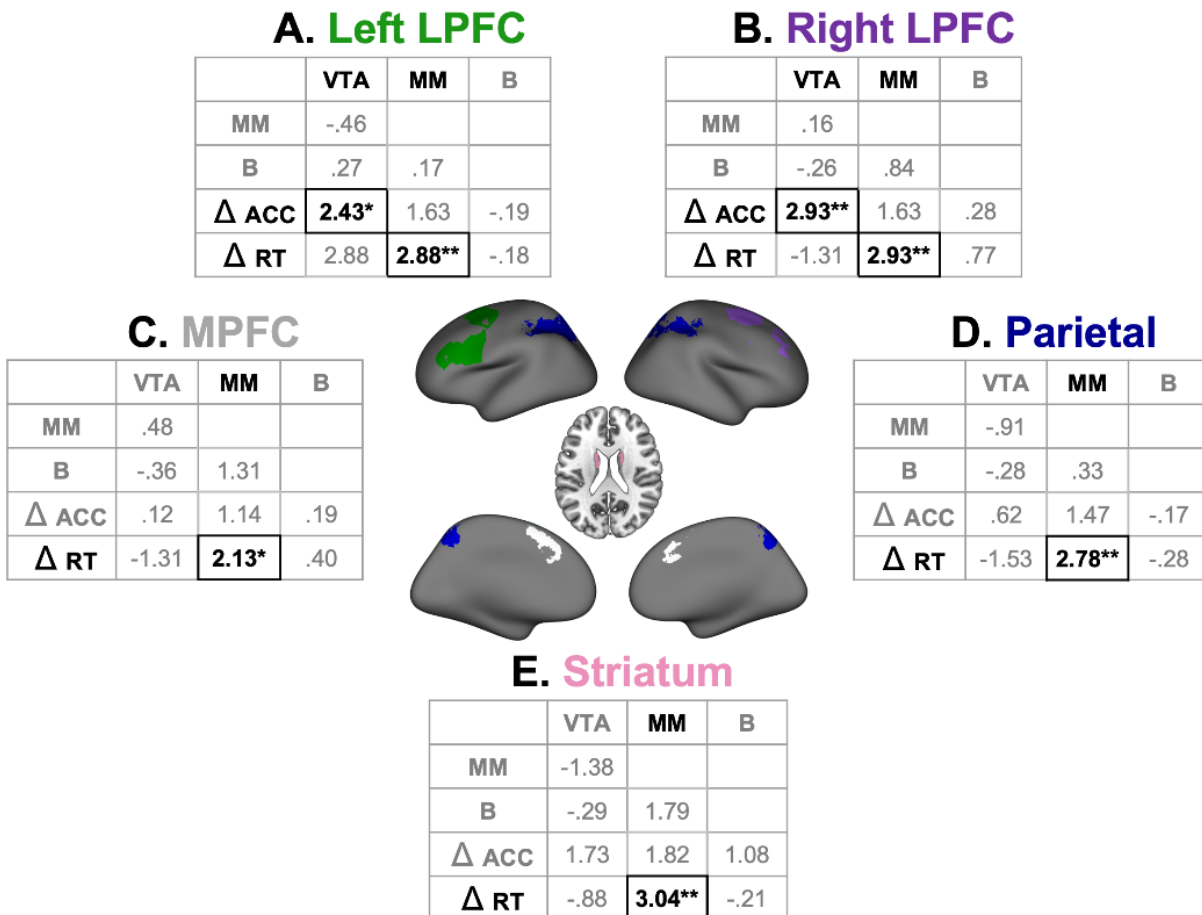

**Supplemental Figure 1.** Correlations between neural measures at baseline and training-related changes in working memory performance. Bold values with an asterisk denote significant associations. \* =  $p \leq .05$ , \*\* =  $p \leq .01$ . Axial slice visualized at  $Z = 22$ . Abbreviations: lateral prefrontal cortex (LPFC), medial prefrontal cortex (MPFC), resting-state functional connectivity between the ventral tegmental area and frontoparietal regions of interest (VTA), T1-w/T2-w ratio “myelin map” (MM) values, 2-back > 1-back beta values (B),  $n$ -back accuracy (ACC),  $n$ -back response times (RT). Statistical models control for age, sex, baseline working memory performance, baseline brain measures, and motion.

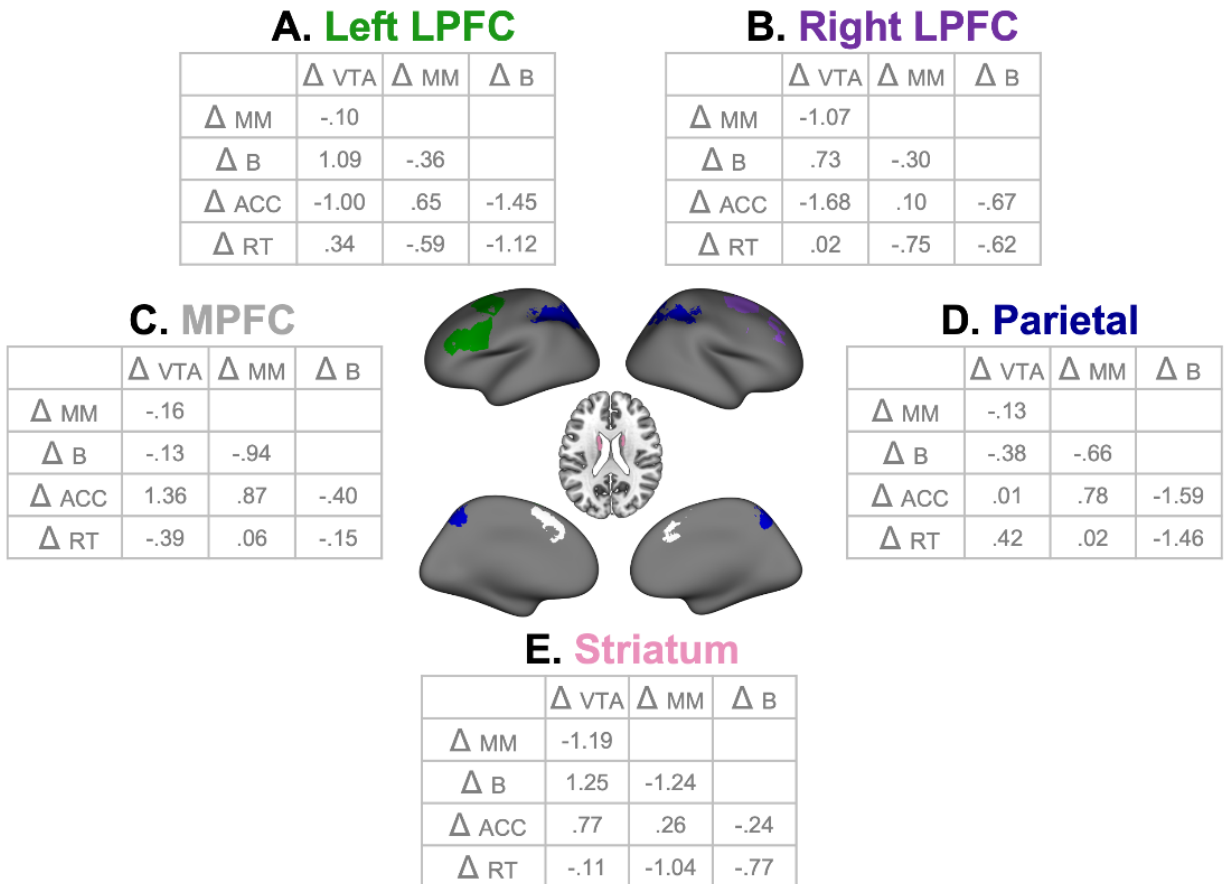

**Supplemental Figure 2.** Correlations between training-related changes in neural measures and training-related changes in working memory performance. Axial slice visualized at  $Z = 22$ . Abbreviations: lateral prefrontal cortex (LPFC), medial prefrontal cortex (MPFC), resting-state functional connectivity between the ventral tegmental area and frontoparietal regions of interest (VTA), T1-w/T2-w ratio “myelin map” (MM) values, 2-back > 1-back beta values (B),  $n$ -back accuracy (ACC),  $n$ -back response times (RT). Statistical models control for age, sex, baseline working memory performance, baseline brain measures, and motion.

## References

1. Reh, R. K. *et al.* Critical period regulation across multiple timescales. *Proc. Natl. Acad. Sci.* **117**, 23242–23251 (2020).
2. Bao, S., Chan, V. T. & Merzenich, M. M. Cortical remodelling induced by activity of ventral tegmental dopamine neurons. *Nature* (2001) doi:10.1038/35083586.
3. McGee, A. W., Yang, Y. ., Fischer, Q. S. ., Daw, N. W. ., Strittmatter, S. M. Experience-Driven Plasticity of Visual Cortex Limited by Myelin and Nogo Receptor. *Science* 2222–2226 (2005).
4. Micheva, K. D. *et al.* A large fraction of neocortical myelin ensheathes axons of local inhibitory neurons. *eLife* (2016) doi:10.7554/eLife.15784.
5. Micheva, K. D. *et al.* Distinctive structural and molecular features of myelinated inhibitory axons in human neocortex. *eNeuro* (2018) doi:10.1523/ENEURO.0297-18.2018.
6. Cisneros-Franco, J. M. & De Villers-Sidani, É. Reactivation of critical period plasticity in adult auditory cortex through chemogenetic silencing of parvalbumin-positive interneurons. *Proc. Natl. Acad. Sci. U. S. A.* (2019) doi:10.1073/pnas.1913227117.
7. Pedrosa, V. & Clopath, C. The role of neuromodulators in cortical plasticity. A computational perspective. *Front. Synaptic Neurosci.* (2017) doi:10.3389/fnsyn.2016.00038.
8. Donahue, C. J., Glasser, M. F., Preuss, T. M., Rilling, J. K. & Van Essen, D. C. Quantitative assessment of prefrontal cortex in humans relative to nonhuman primates. *Proc. Natl. Acad. Sci. U. S. A.* (2018) doi:10.1073/pnas.1721653115.
9. Glasser, M. F., Goyal, M. S., Preuss, T. M., Raichle, M. E. & Van Essen, D. C. Trends and properties of human cerebral cortex: correlations with cortical myelin content. *NeuroImage* **93 Pt 2**, 165–175 (2014).
10. Palomero-Gallagher, N., Amunts, K. & Zilles, K. Transmitter Receptor Distribution in the Human Brain. *Brain Mapp. Encycl. Ref.* **2**, 261–275 (2015).
11. Giedd, J. N. & Rapoport, J. L. Structural MRI of Pediatric Brain Development: What Have

- We Learned and Where Are We Going? *Neuron* **67**, 728–734 (2010).
12. Gogtay, N. *et al.* Dynamic mapping of human cortical development during childhood through early adulthood. *Proc. Natl. Acad. Sci.* **101**, 8174–8179 (2004).
  13. Gratton, C. *et al.* Functional Brain Networks Are Dominated by Stable Group and Individual Factors, Not Cognitive or Daily Variation. *Neuron* **98**, 439–452.e5 (2018).
  14. Duncan, J. The multiple-demand (MD) system of the primate brain: mental programs for intelligent behaviour. *Trends Cogn. Sci.* (2010) doi:10.1016/j.tics.2010.01.004.
  15. Murray, J. D., Jaramillo, J. & Wang, X.-J. Working Memory and Decision-Making in a Frontoparietal Circuit Model. *J. Neurosci.* **37**, 12167–12186 (2017).
  16. Vendetti, M. S. & Bunge, S. A. Evolutionary and Developmental Changes in the Lateral Frontoparietal Network: A Little Goes a Long Way for Higher-Level Cognition. *Neuron* **84**, 906–917 (2014).
  17. Buckner, R. L. & Krienen, F. M. The evolution of distributed association networks in the human brain. *Trends Cogn. Sci.* **17**, 648–665 (2013).
  18. Sydnor, V. J. *et al.* Neurodevelopment of the association cortices: Patterns, mechanisms, and implications for psychopathology. *Neuron* **109**, 2820–2846 (2021).
  19. Buschkuhl, M., Hernandez-Garcia, L., Jaeggi, S. M., Bernard, J. A. & Jonides, J. Neural effects of short-term training on working memory. *Cogn. Affect. Behav. Neurosci.* **14**, 147–160 (2014).
  20. Hempel, A. *et al.* Plasticity of cortical activation related to working memory during training. *Am. J. Psychiatry* **161**, 745–747 (2004).
  21. Mackey, A. P., Miller Singley, A. T., Wendelken, C. & Bunge, S. A. Characterizing Behavioral and Brain Changes Associated with Practicing Reasoning Skills. *PLOS ONE* **10**, e0137627–e0137627 (2015).
  22. Salmi, J., Nyberg, L. & Laine, M. Working memory training mostly engages general-purpose large-scale networks for learning. *Neurosci. Biobehav. Rev.* **93**, 108–122 (2018).

23. Schneiders, J. A., Opitz, B., Krick, C. M. & Mecklinger, A. Separating intra-modal and across-modal training effects in visual working memory: An fMRI investigation. *Cereb. Cortex* **21**, 2555–2564 (2011).
24. Schneiders, J. A. *et al.* The impact of auditory working memory training on the fronto-parietal working memory network. *Front. Hum. Neurosci.* **6**, 173–173 (2012).
25. Schweizer, S., Grahn, J., Hampshire, A., Mobbs, D. & Dalgleish, T. Training the emotional brain: Improving affective control through emotional working memory training. *Ann. Intern. Med.* **158**, 5301–5311 (2013).
26. Thompson, T. W., Waskom, M. L. & Gabrieli, J. D. E. Intensive working memory training produces functional changes in large-scale frontoparietal networks. *J. Cogn. Neurosci.* (2016) doi:10.1162/jocn\_a\_00916.
27. Finc, K. *et al.* Dynamic reconfiguration of functional brain networks during working memory training. *Nat. Commun.* **11**, 2435 (2020).
28. Hampshire, A., Thompson, R., Duncan, J. & Owen, A. M. Lateral prefrontal cortex subregions make dissociable contributions during fluid reasoning. *Cereb. Cortex* (2011) doi:10.1093/cercor/bhq085.
29. Mackey, A. P., Whitaker, K. J. & Bunge, S. A. Experience-dependent plasticity in white matter microstructure: reasoning training alters structural connectivity. *Front. Neuroanat.* **6**, 32 (2012).
30. Mackey, A. P., Miller Singley, A. T. & Bunge, S. A. Intensive reasoning training alters patterns of brain connectivity at rest. *J. Neurosci. Off. J. Soc. Neurosci.* **33**, 4796–4803 (2013).
31. Takeuchi, H. *et al.* Training of Working Memory Impacts Structural Connectivity. *J. Neurosci.* **30**, 3297–3303 (2010).
32. Basak, C., Voss, M. W., Erickson, K. I., Boot, W. R. & Kramer, A. F. Regional differences in brain volume predict the acquisition of skill in a complex real-time strategy videogame. *Brain*



- Cogn.* (2011) doi:10.1016/j.bandc.2011.03.017.
33. Chen, C. *et al.* Sex determines the neurofunctional predictors of visual word learning. *Neuropsychologia* (2007) doi:10.1016/j.neuropsychologia.2006.08.018.
34. Mei, L. *et al.* Neural predictors of auditory word learning. *NeuroReport* (2008) doi:10.1097/WNR.0b013e3282f46ea9.
35. Mukai, I. *et al.* Activations in Visual and Attention-Related Areas Predict and Correlate with the Degree of Perceptual Learning. *J. Neurosci.* **27**, 11401–11411 (2007).
36. Reavis, E. A., Frank, S. M. & Tse, P. U. Caudate nucleus reactivity predicts perceptual learning rate for visual feature conjunctions. *NeuroImage* **110**, 171–181 (2015).
37. Frank, S. M., Reavis, E. A., Greenlee, M. W. & Tse, P. U. Pretraining Cortical Thickness Predicts Subsequent Perceptual Learning Rate in a Visual Search Task. *Cereb. Cortex* **26**, 1211–1220 (2016).
38. Mattar, M. G. *et al.* Predicting future learning from baseline network architecture. *NeuroImage* **172**, 107–117 (2018).
39. Ventura-Campos, N. *et al.* Spontaneous brain activity predicts learning ability of foreign sounds. *J. Neurosci.* (2013) doi:10.1523/JNEUROSCI.4655-12.2013.
40. Blissitt, P. A. Sleep, memory, and learning. *J. Neurosci. Nurs. J. Am. Assoc. Neurosci. Nurses* (2001) doi:10.1097/01376517-200108000-00007.
41. Schwabe, L., Joëls, M., Roozendaal, B., Wolf, O. T. & Oitzl, M. S. Stress effects on memory: An update and integration. *Neurosci. Biobehav. Rev.* (2012) doi:10.1016/j.neubiorev.2011.07.002.
42. Brooks, S. J., Mackenzie-Phelan, R., Tully, J. & Schiöth, H. B. Review of the Neural Processes of Working Memory Training: Controlling the Impulse to Throw the Baby Out With the Bathwater. *Front. Psychiatry* (2020) doi:10.3389/fpsy.2020.512761.
43. Landau, S. M., Schumacher, E. H., Garavan, H., Druzgal, T. J. & D'Esposito, M. A functional MRI study of the influence of practice on component processes of working memory.

- NeuroImage* **22**, 211–221 (2004).
44. Landau, S. M., Garavan, H., Schumacher, E. H. & D'Esposito, M. Regional specificity and practice: dynamic changes in object and spatial working memory. *Brain Res.* **1180**, 78–89 (2007).
  45. Yamashita, M., Kawato, M. & Imamizu, H. Predicting learning plateau of working memory from whole-brain intrinsic network connectivity patterns. *Sci. Rep.* (2015)  
doi:10.1038/srep07622.
  46. Bassett, D. S. *et al.* Dynamic reconfiguration of human brain networks during learning. *Proc. Natl. Acad. Sci.* **108**, 7641–7646 (2011).
  47. Bassett, D. S., Yang, M., Wymbs, N. F. & Grafton, S. T. Learning-induced autonomy of sensorimotor systems. *Nat. Neurosci.* **18**, 744–751 (2015).
  48. Owen, A. M., McMillan, K. M., Laird, A. R. & Bullmore, E. N-back working memory paradigm: a meta-analysis of normative functional neuroimaging studies. *Hum. Brain Mapp.* **25**, 46–59 (2005).
  49. Guerra-Carrillo, B., Mackey, A. P. & Bunge, S. A. Resting-State fMRI: A Window into Human Brain Plasticity. *The Neuroscientist* **20**, 522–533 (2014).
  50. Ganzetti, M., Wenderoth, N. & Mantini, D. Whole brain myelin mapping using T1- and T2-weighted MR imaging data. *Front. Hum. Neurosci.* **8**, (2014).
  51. Glasser, M. F. & Van Essen, D. C. Mapping Human Cortical Areas In Vivo Based on Myelin Content as Revealed by T1- and T2-Weighted MRI. *J. Neurosci.* **31**, 11597–11616 (2011).
  52. Tisdall, M. D. *et al.* Volumetric navigators for prospective motion correction and selective reacquisition in neuroanatomical MRI. *Magn. Reson. Med.* **68**, 389–399 (2012).
  53. Jenkinson, M., Bannister, P., Brady, M. & Smith, S. Improved optimization for the robust and accurate linear registration and motion correction of brain images. *NeuroImage* (2002)  
doi:10.1016/S1053-8119(02)91132-8.
  54. Greve, D. N. & Fischl, B. Accurate and robust brain image alignment using boundary-based

- registration. *NeuroImage* (2009) doi:10.1016/j.neuroimage.2009.06.060.
55. Jenkinson, M. & Smith, S. A global optimisation method for robust affine registration of brain images. *Med. Image Anal.* (2001) doi:10.1016/S1361-8415(01)00036-6.
56. Worsley, K. J. *et al.* A General Statistical Analysis for fMRI Data. *NeuroImage* **15**, 1–15 (2002).
57. Dale, A. M., Fischl, B. & Sereno, M. I. Cortical surface-based analysis: I. Segmentation and surface reconstruction. *NeuroImage* **9**, 179–194 (1999).
58. Gorgolewski, K. *et al.* Nipype: A flexible, lightweight and extensible neuroimaging data processing framework in Python. *Front. Neuroinformatics* (2011) doi:10.3389/fninf.2011.00013.
59. Jenkinson, M., Beckmann, C. F., Behrens, T. E. J., Woolrich, M. W. & Smith, S. M. FSL. *NeuroImage* **62**, 782–790 (2012).
60. Avants, B. B. *et al.* A reproducible evaluation of ANTs similarity metric performance in brain image registration. *NeuroImage* (2011) doi:10.1016/j.neuroimage.2010.09.025.
61. Roche, A. A four-dimensional registration algorithm with application to joint correction of motion and slice timing in fMRI. *IEEE Trans. Med. Imaging* (2011) doi:10.1109/TMI.2011.2131152.
62. Behzadi, Y., Restom, K., Liau, J. & Liu, T. T. A component based noise correction method (CompCor) for BOLD and perfusion based fMRI. *NeuroImage* (2007) doi:10.1016/j.neuroimage.2007.04.042.
63. Murty, V. P. *et al.* Resting state networks distinguish human ventral tegmental area from substantia nigra. *NeuroImage* (2014) doi:10.1016/j.neuroimage.2014.06.047.
64. Ganzetti, M., Wenderoth, N. & Mantini, D. Mapping pathological changes in brain structure by combining T1- and T2-weighted MR imaging data. *Neuroradiology* **57**, 917–928 (2015).
65. Collignon, A. *et al.* Automated multi-modality image registration based on information theory. *Bizais* (1995).

66. Desikan, R. S. *et al.* An automated labeling system for subdividing the human cerebral cortex on MRI scans into gyral based regions of interest. *13* (2006).
67. Destrieux, C., Fischl, B., Dale, A. & Halgren, E. Automatic parcellation of human cortical gyri and sulci using standard anatomical nomenclature. *NeuroImage* **53**, 1–15 (2010).
68. Fischl, B. FreeSurfer. *NeuroImage* **62**, 774–781 (2012).
69. Gurden, H., Takita, M. & Jay, T. M. Essential role of D1 but not D2 receptors in the NMDA receptor-dependent long-term potentiation at hippocampal-prefrontal cortex synapses in vivo. *J. Neurosci. Off. J. Soc. Neurosci.* (2000) doi:10.1523/jneurosci.20-22-j0003.2000.
70. Otani, S., Daniel, H., Roisin, M. P. & Crepel, F. Dopaminergic Modulation of Long-term Synaptic Plasticity in Rat Prefrontal Neurons. *Cereb. Cortex* (2003) doi:10.1093/cercor/bhg092.
71. Puig, M. V., Rose, J., Schmidt, R. & Freund, N. Dopamine modulation of learning and memory in the prefrontal cortex: insights from studies in primates, rodents, and birds. *Front. Neural Circuits* **8**, (2014).
72. Mi, Y., Katkov, M. & Tsodyks, M. Synaptic Correlates of Working Memory Capacity. *Neuron* (2017) doi:10.1016/j.neuron.2016.12.004.
73. Mongillo, G., Barak, O. & Tsodyks, M. Synaptic Theory of Working Memory. *Science* (2008) doi:10.1126/science.1150769.
74. Spaak, E., Watanabe, K., Funahashi, S. & Stokes, M. G. Stable and dynamic coding for working memory in primate prefrontal cortex. *J. Neurosci.* (2017) doi:10.1523/JNEUROSCI.3364-16.2017.
75. Kosobud, A. E. K., Harris, G. C. & Chapin, J. K. Behavioral associations of neuronal activity in the ventral tegmental area of the rat. *J. Neurosci.* (1994) doi:10.1523/jneurosci.14-11-07117.1994.
76. McKerracher, L. *et al.* Identification of myelin-associated glycoprotein as a major myelin-derived inhibitor of neurite growth. *Neuron* (1994) doi:10.1016/0896-6273(94)90247-X.

77. Elliott, M. L. *et al.* General functional connectivity: Shared features of resting-state and task fMRI drive reliable and heritable individual differences in functional brain networks. *NeuroImage* **189**, 516–532 (2019).
78. Radley, J., Morilak, D., Viau, V. & Campeau, S. Chronic stress and brain plasticity: Mechanisms underlying adaptive and maladaptive changes and implications for stress-related CNS disorders. *Neurosci. Biobehav. Rev.* (2015)  
doi:10.1016/j.neubiorev.2015.06.018.
79. Abel, T., Havekes, R., Saletin, J. M. & Walker, M. P. Sleep, plasticity and memory from molecules to whole-brain networks. *Curr. Biol.* (2013) doi:10.1016/j.cub.2013.07.025.
80. Havekes, R., Vecsey, C. G. & Abel, T. The impact of sleep deprivation on neuronal and glial signaling pathways important for memory and synaptic plasticity. *Cell. Signal.* (2012)  
doi:10.1016/j.cellsig.2012.02.010.
81. Bergami, M. *et al.* A Critical Period for Experience-Dependent Remodeling of Adult-Born Neuron Connectivity. *Neuron* (2015) doi:10.1016/j.neuron.2015.01.001.
82. Fu, M. & Zuo, Y. Experience-dependent structural plasticity in the cortex. *Trends Neurosci.* (2011) doi:10.1016/j.tins.2011.02.001.
